# Supplementary material for: Advancing a “Good Life” for Farm Animals: Development of Resource Tier Frameworks for On-Farm Assessment of Positive Welfare for Beef Cattle, Broiler Chicken and Pigs
Source: Animals (Basel). 2022 Feb 23;12(5):565. doi: 10.3390/ani12050565 (PMC8908822; doi:10.3390/ani12050565)
Supplement: Supplementary file 1 [file animals-12-00565-s001.zip]

Archive with 6 entries (6 files):
- S1 Beef cattle Good Life Framework pre pilot.pdf
- S2 Broiler Good Life Framework pre pilot.pdf
- S3 Pig Good Life Framework pre pilot.pdf
- S4 Beef cattle Good Life Framework post pilot.pdf
- S5 Broiler Good Life Framework post pilot.pdf
- S6 Pig Good Life Framework post pilot.pdf
